# Supplementary material for: New Observational Material about Seismic and Non-Seismic Tsunamis in Greece and Surrounding Areas from 1900 to 2023
Source: MDPI journal article supplement (doi:10.3390/geohazards5010012), 2024-03-04
Supplement: s1 [file s1]

**Supplementary Materials:** Links to online available information sources.

### **Karpathos 1948 tsunami**

Dimellas, M. Enceladus and Tsunami in the stocks of Karpathos island. 2020a, (<https://www.verena.gr/content/%CE%BF-%CE%B5%CE%B3%CE%BA%CE%AD%CE%BB%CE%B1%CE%B4%CE%BF%CF%82-%CE%BA%CE%B1%CE%B9-%CF%84%CE%BF-%CF%84%CF%83%CE%BF%CF%85%CE%BD%CE%AC%CE%BC%CE%B9-%CF%83%CF%84%CE%B1-%CE%BA%CE%B1%CF%81%CF%80%CE%AC%CE%B8%CE%B9%CE%BA%CE%B1-%CE%BC%CE%B5%CF%84%CF%8C%CF%87%CE%B9%CE%B1-t%CE%BF%CF%85-%CE%BC%CE%B1%CE%BD%CF%8E%CE%BB%CE%B7-%CE%B4%CE%B7%CE%BC%CE%B5%CE%BB%CE%BB%CE%AC>) (last access 23 July 2023)

Dimellas, M. I Evaggelistria tis Karpathou. 2020b (<https://www.rodiki.gr/article/437823/h-evaggelistria-h-kalytera-h-baggelistra-ths-karpathoy>) (last access 23 July 2023)

### **Cephalonia 1953 tsunami**

Fragias, F. A description of the 1953 tsunami. 2014. (<http://pronoikefalonias.blogspot.com/2014/02/1953.html>) (last access 21 July 2023):

### **Zakynthos 2018 sea wave in “Shipwreck” beach**

<https://www.zougla.gr/greece/article/i-stigmi-tis-katolis8isis-stin-paralia-tis-zakin8ou>;  
<https://www.instagram.com/p/Bnqf0gChzGe/> (last access 23 July 2023)

<https://www.newsbomb.gr/ellada/story/915795/zakynthos-allaxe-dramatika-to-topio-sto-nayagio-meta-tin-katolisthisi> (last access 23 July 2023)

[https://www.instagram.com/p/Bnqf0gChzGe/?utm\\_source=ig\\_embed&utm\\_campaign=embed\\_video\\_watch\\_again](https://www.instagram.com/p/Bnqf0gChzGe/?utm_source=ig_embed&utm_campaign=embed_video_watch_again) (last access 23 July 2023)
